# Supplementary material for: Two series of novel 3D potentially porous heterometallic Cu–Ln coordination frameworks assembled by 3,4-pyridinedicarboxylic acid with different topologies and channels: syntheses, structures, luminescence and magnetic properties
Source: Royal Society of Chemistry journal article supplement (doi:10.1039/c4ra13533d), 2015-01-01
Supplement: c4ra13533d1.pdf [file c4ra13533d1.pdf]

## Supporting Information

### Two series of novel 3D potentially porous heterometallic Cu–Ln coordination frameworks assembled by 3,4-Pyridinedicarboxylic acid with different topologies and channels: syntheses, structures, luminescence and magnetic properties

Xuan-Wen Liu,<sup>a</sup> Rui Guo,<sup>a</sup> He Liu,<sup>a</sup> Ye-Qi Yu,<sup>a</sup> Xi-Wei Qi,<sup>a</sup> Jing-Yuan Xu<sup>b</sup> and Cheng-Zhi Xie<sup>\*b</sup>

<sup>a</sup>Key Laboratory of Electronic Information and Energy Materials of Qinhuangdao, Northeastern University at Qinhuangdao, Qinhuangdao, 066004, P. R. China.

<sup>b</sup>Tianjin Key Laboratory on Technologies Enabling Development of Clinical Therapeutics and Diagnostics (Theranostics), School of Pharmacy, Tianjin Medical University, Tianjin 300070, P. R. China.

\* E-mail: xiechengzhi@tmu.edu.cn

## Table of Contents

| <b>Contents</b> | <b>Page No</b> |
|-----------------|----------------|
| Table S1.....   | S1             |
| Figure S1.....  | S6             |
| Figure S2.....  | S7             |
| Figure S3.....  | S8             |
| Figure S4.....  | S8             |
| Figure S5.....  | S9             |
| Figure S6.....  | S10            |
| Figure S7.....  | S11            |
| Figure S8.....  | S11            |
| Figure S9.....  | S12            |
| Figure S10..... | S12            |
| Figure S11..... | S13            |
| Figure S12..... | S13            |

**Table S1.** Selected bond lengths (Å) and angles (°) for complexes 1–5

| Complex 1                |            |                     |            |
|--------------------------|------------|---------------------|------------|
| Eu(1)-O(29)              | 2.415(2)   | Eu(1)-O(30)         | 2.420(2)   |
| Eu(1)-O(28)              | 2.427(3)   | Eu(1)-O(27)         | 2.440(2)   |
| Eu(1)-O(26)              | 2.431(3)   | Eu(1)-O(20)#1       | 2.436(2)   |
| Eu(1)-O(6)               | 2.482(2)   | Eu(1)-O(5)          | 2.528(2)   |
| Eu(1)-O(19)#1            | 2.541(2)   | Eu(2)-O(16)         | 2.363(2)   |
| Eu(2)-O(32)              | 2.406(2)   | Eu(2)-O(35)         | 2.439(2)   |
| Eu(2)-O(4)#2             | 2.443(2)   | Eu(2)-O(34)         | 2.452(2)   |
| Eu(2)-O(33)              | 2.460(2)   | Eu(2)-O(22)         | 2.514(2)   |
| Eu(2)-O(21)              | 2.514(2)   | Eu(2)-O(3)#2        | 2.544(2)   |
| Cu(1)-O(2)               | 1.979(2)   | Cu(1)-O(11)#3       | 1.985(2)   |
| Cu(1)-N(2)               | 2.013(3)   | Cu(1)-N(6)#4        | 2.023(3)   |
| Cu(1)-O(31)              | 2.294(3)   | Cu(2)-N(4)          | 1.987(2)   |
| Cu(2)-N(3)               | 1.999(3)   | Cu(2)-O(8)          | 2.009(2)   |
| Cu(2)-O(24)#5            | 2.026(2)   | Cu(2)-O(25)         | 2.237(3)   |
| Cu(3)-O(13)              | 1.985(2)   | Cu(3)-N(5)#6        | 1.990(2)   |
| Cu(3)-O(17)              | 1.990(2)   | Cu(3)-N(1)#7        | 2.008(2)   |
| Cu(3)-O(36)              | 2.247(4)   | Cu(3)-O(36A)        | 2.249(6)   |
| O(29)-Eu(1)-O(28)        | 70.73(9)   | O(29)-Eu(1)-O(30)   | 76.65(8)   |
| O(28)-Eu(1)-O(30)        | 139.49(9)  | O(29)-Eu(1)-O(26)   | 78.12(9)   |
| O(28)-Eu(1)-O(26)        | 74.86(10)  | O(30)-Eu(1)-O(26)   | 75.48(8)   |
| O(29)-Eu(1)-O(27)        | 137.66(8)  | O(28)-Eu(1)-O(27)   | 68.01(9)   |
| O(30)-Eu(1)-O(27)        | 144.50(8)  | O(26)-Eu(1)-O(27)   | 99.69(9)   |
| O(16)-Eu(2)-O(32)        | 77.37(8)   | O(16)-Eu(2)-O(35)   | 73.32(8)   |
| O(32)-Eu(2)-O(35)        | 72.99(9)   | O(16)-Eu(2)-O(4)#2  | 140.15(7)  |
| O(32)-Eu(2)-O(4)#2       | 100.06(8)  | O(35)-Eu(2)-O(4)#2  | 68.11(8)   |
| O(16)-Eu(2)-O(34)        | 82.15(8)   | O(32)-Eu(2)-O(34)   | 144.96(8)  |
| O(35)-Eu(2)-O(34)        | 74.04(9)   | O(4)#2-Eu(2)-O(34)  | 78.16(7)   |
| O(16)-Eu(2)-O(33)        | 95.59(8)   | O(32)-Eu(2)-O(33)   | 70.11(8)   |
| O(11)#3-Cu(1)-N(2)       | 92.26(9)   | O(2)-Cu(1)-N(6)#4   | 89.53(9)   |
| O(11)#3-Cu(1)-<br>N(6)#4 | 89.64(9)   | N(2)-Cu(1)-N(6)#4   | 177.30(11) |
| O(2)-Cu(1)-O(31)         | 94.36(10)  | O(11)#3-Cu(1)-O(31) | 89.70(10)  |
| N(2)-Cu(1)-O(31)         | 91.30(11)  | N(6)#4-Cu(1)-O(31)  | 90.64(11)  |
| N(4)-Cu(2)-N(3)          | 170.08(11) | N(4)-Cu(2)-O(8)     | 87.61(9)   |
| N(3)-Cu(2)-O(8)          | 93.53(9)   | N(4)-Cu(2)-O(24)#5  | 91.62(9)   |
| N(3)-Cu(2)-O(24)#5       | 86.43(9)   | O(8)-Cu(2)-O(24)#5  | 175.19(10) |
| Complex 2                |            |                     |            |
| Gd(1)-O(28)              | 2.409(6)   | Gd(1)-O(30)         | 2.410(5)   |
| Gd(1)-O(27)              | 2.412(5)   | Gd(1)-O(29)         | 2.416(5)   |

|                     |            |                          |            |
|---------------------|------------|--------------------------|------------|
| Gd(1)-O(20)#1       | 2.416(5)   | Gd(1)-O(26)              | 2.434(6)   |
| Gd(1)-O(6)          | 2.479(5)   | Gd(1)-O(5)               | 2.505(5)   |
| Gd(1)-O(19)#1       | 2.538(5)   | Gd(2)-O(16)              | 2.348(5)   |
| Gd(2)-O(32)         | 2.399(5)   | Gd(2)-O(4)#2             | 2.439(4)   |
| Gd(2)-O(34)         | 2.441(5)   | Gd(2)-O(33)              | 2.444(5)   |
| Gd(2)-O(35)         | 2.446(5)   | Gd(2)-O(21)              | 2.500(5)   |
| Gd(2)-O(22)         | 2.514(5)   | Gd(2)-O(3)#2             | 2.541(5)   |
| Cu(1)-O(11)#3       | 1.974(4)   | Cu(1)-O(2)               | 1.978(4)   |
| Cu(1)-N(2)          | 2.016(5)   | Cu(1)-N(6)#4             | 2.021(5)   |
| Cu(1)-O(31)         | 2.292(7)   | Cu(2)-N(4)               | 1.988(5)   |
| Cu(2)-N(3)          | 1.994(5)   | Cu(2)-O(8)               | 2.013(4)   |
| Cu(2)-O(24)#5       | 2.022(4)   | Cu(2)-O(25)              | 2.229(5)   |
| Cu(3)-O(13)         | 1.990(4)   | Cu(3)-O(17)              | 1.994(4)   |
| Cu(3)-N(5)#6        | 1.997(5)   | Cu(3)-N(1)#7             | 2.006(5)   |
| Cu(3)-O(36A)        | 2.219(16)  | Cu(3)-O(36)              | 2.255(7)   |
| O(28)-Gd(1)-O(30)   | 139.9(2)   | O(28)-Gd(1)-O(27)        | 69.2(2)    |
| O(30)-Gd(1)-O(27)   | 143.20(18) | O(28)-Gd(1)-O(20)#1      | 76.9(3)    |
| O(30)-Gd(1)-O(20)#1 | 122.17(18) | O(16)-Gd(2)-O(32)        | 77.50(19)  |
| O(16)-Gd(2)-O(4)#2  | 140.29(16) | O(32)-Gd(2)-O(4)#2       | 100.08(17) |
| O(16)-Gd(2)-O(34)   | 82.09(19)  | O(32)-Gd(2)-O(34)        | 144.62(19) |
| O(11)#3-Cu(1)-O(2)  | 176.1(2)   | O(11)#3-Cu(1)-N(2)       | 92.2(2)    |
| O(2)-Cu(1)-N(2)     | 88.48(19)  | O(11)#3-Cu(1)-<br>N(6)#4 | 89.7(2)    |
| O(2)-Cu(1)-N(6)#4   | 89.5(2)    | N(2)-Cu(1)-N(6)#4        | 177.2(2)   |
| O(11)#3-Cu(1)-O(31) | 89.6(2)    | O(2)-Cu(1)-O(31)         | 94.3(2)    |
| N(2)-Cu(1)-O(31)    | 91.2(2)    | N(6)#4-Cu(1)-O(31)       | 91.0(2)    |
| N(4)-Cu(2)-N(3)     | 170.3(2)   | N(4)-Cu(2)-O(8)          | 87.59(19)  |
| N(3)-Cu(2)-O(8)     | 93.54(19)  | N(4)-Cu(2)-O(24)#5       | 91.27(19)  |
| N(3)-Cu(2)-O(24)#5  | 86.73(19)  | O(8)-Cu(2)-O(24)#5       | 174.70(19) |
| N(4)-Cu(2)-O(25)    | 96.8(2)    | N(3)-Cu(2)-O(25)         | 92.8(2)    |
| O(8)-Cu(2)-O(25)    | 90.7(2)    | O(24)#5-Cu(2)-O(25)      | 94.6(2)    |
| O(13)-Cu(3)-O(17)   | 166.7(2)   | O(13)-Cu(3)-N(5)#6       | 90.7(2)    |
| O(17)-Cu(3)-N(5)#6  | 88.1(2)    | O(13)-Cu(3)-N(1)#7       | 90.81(19)  |
| O(17)-Cu(3)-N(1)#7  | 90.47(19)  | N(5)#6-Cu(3)-N(1)#7      | 178.5(2)   |
| O(13)-Cu(3)-O(36)   | 103.7(3)   | O(17)-Cu(3)-O(36)        | 89.6(3)    |
| N(5)#6-Cu(3)-O(36)  | 92.7(3)    | N(1)#7-Cu(3)-O(36)       | 86.7(2)    |
| O(28)-Gd(1)-O(30)   | 139.9(2)   | O(28)-Gd(1)-O(27)        | 69.2(2)    |
| <b>Complex 3</b>    |            |                          |            |
| Tb(1)-O(29)         | 2.419(6)   | Tb(1)-O(2)               | 2.426(5)   |
| Tb(1)-O(27)         | 2.432(6)   | Tb(1)-O(28)              | 2.436(6)   |
| Tb(1)-O(6)          | 2.485(5)   | Tb(1)-O(7)               | 2.493(5)   |
| Tb(1)-O(3)          | 2.537(5)   | Tb(2)-O(36)              | 2.395(7)   |
| Tb(2)-O(33)         | 2.406(6)   | Tb(2)-O(34)              | 2.398(5)   |

|                      |            |                       |            |
|----------------------|------------|-----------------------|------------|
| Tb(2)-O(22)          | 2.398(5)   | Tb(2)-O(35)           | 2.400(5)   |
| Tb(2)-O(31)          | 2.402(6)   | Tb(2)-O(21)           | 2.458(5)   |
| Tb(2)-O(20)          | 2.501(5)   | Tb(2)-O(23)           | 2.527(5)   |
| Cu(1)-O(16)#2        | 1.987(5)   | Cu(1)-O(24)#3         | 1.996(5)   |
| Cu(1)-N(2)           | 1.994(6)   | Cu(1)-N(1)#2          | 2.007(6)   |
| Cu(1)-O(1)           | 2.216(7)   | Cu(2)-N(4)            | 1.986(6)   |
| Cu(2)-N(3)           | 1.992(6)   | Cu(2)-O(18)           | 2.011(5)   |
| Cu(2)-O(9)           | 2.025(5)   | Cu(2)-O(30)           | 2.229(6)   |
| Cu(3)-O(12)#4        | 1.978(5)   | Cu(3)-O(4)#5          | 1.986(5)   |
| Cu(3)-N(5)           | 2.009(6)   | Cu(3)-N(6)#4          | 2.022(6)   |
| Cu(3)-O(32)          | 2.285(7)   |                       |            |
| O(26)-Tb(1)-O(29)    | 73.4(2)    | O(14)#1-Tb(1)-O(2)    | 140.79(18) |
| O(26)-Tb(1)-O(2)     | 99.95(19)  | O(29)-Tb(1)-O(2)      | 68.03(18)  |
| O(14)#1-Tb(1)-O(27)  | 94.8(2)    | O(26)-Tb(1)-O(27)     | 70.1(2)    |
| O(36)-Tb(2)-O(34)    | 139.4(2)   | O(36)-Tb(2)-O(22)     | 77.4(3)    |
| O(34)-Tb(2)-O(22)    | 122.46(19) | O(36)-Tb(2)-O(35)     | 70.7(3)    |
| O(34)-Tb(2)-O(35)    | 75.9(2)    | O(22)-Tb(2)-O(35)     | 85.2(2)    |
| O(16)#2-Cu(1)-N(2)   | 90.3(2)    | O(16)#2-Cu(1)-O(24)#3 | 166.2(2)   |
| N(2)-Cu(1)-O(24)#3   | 88.3(2)    | O(16)#2-Cu(1)-N(1)#2  | 91.2(2)    |
| N(2)-Cu(1)-N(1)#2    | 178.4(2)   | O(24)#3-Cu(1)-N(1)#2  | 90.2(2)    |
| O(16)#2-Cu(1)-O(1)   | 100.4(3)   | N(2)-Cu(1)-O(1)       | 91.7(3)    |
| O(24)#3-Cu(1)-O(1)   | 93.4(3)    | N(1)#2-Cu(1)-O(1)     | 87.7(3)    |
| N(4)-Cu(2)-N(3)      | 170.4(2)   | N(4)-Cu(2)-O(18)      | 87.7(2)    |
| N(3)-Cu(2)-O(18)     | 93.3(2)    | N(4)-Cu(2)-O(9)       | 91.4(2)    |
| N(3)-Cu(2)-O(9)      | 86.7(2)    | O(18)-Cu(2)-O(9)      | 174.9(2)   |
| N(4)-Cu(2)-O(30)     | 96.4(2)    | N(3)-Cu(2)-O(30)      | 93.1(2)    |
| O(18)-Cu(2)-O(30)    | 90.3(2)    | O(9)-Cu(2)-O(30)      | 94.7(2)    |
| O(12)#4-Cu(3)-O(4)#5 | 175.9(2)   | O(12)#4-Cu(3)-N(5)    | 92.1(2)    |
| O(4)#5-Cu(3)-N(5)    | 88.4(2)    | O(12)#4-Cu(3)-N(6)#4  | 89.6(2)    |
| O(4)#5-Cu(3)-N(6)#4  | 89.7(2)    | N(5)-Cu(3)-N(6)#4     | 177.4(3)   |

#### Complex 4

|                   |          |                     |          |
|-------------------|----------|---------------------|----------|
| Cu(1)-N(1)        | 2.004(6) | Cu(1)-O(7)#2        | 2.002(5) |
| Cu(1)-O(3)#1      | 1.981(5) | Cu(1)-N(2)          | 1.997(5) |
| Cu(1)-O(5)        | 2.301(7) | Ho(1)-O(14)         | 2.337(5) |
| Ho(1)-O(13)       | 2.340(5) | Ho(1)-O(10)#3       | 2.369(5) |
| Ho(1)-O(9)        | 2.412(5) | Ho(1)-O(11)         | 2.425(5) |
| Ho(1)-O(8)        | 2.435(5) | Ho(1)-O(2)#4        | 2.437(5) |
| Ho(1)-O(1)#4      | 2.478(5) | Ho(1)-O(10)         | 2.504(5) |
| O(3)#1-Cu(1)-N(2) | 88.6(2)  | O(3)#1-Cu(1)-O(7)#2 | 174.4(2) |
| N(2)-Cu(1)-O(7)#2 | 90.7(2)  | O(3)#1-Cu(1)-N(1)   | 91.2(2)  |
| N(2)-Cu(1)-N(1)   | 177.4(2) | O(7)#2-Cu(1)-N(1)   | 89.3(2)  |
| O(3)#1-Cu(1)-O(5) | 90.4(2)  | N(2)-Cu(1)-O(5)     | 90.8(2)  |
| O(7)#2-Cu(1)-O(5) | 95.2(2)  | N(1)-Cu(1)-O(5)     | 91.8(2)  |

|                     |            |                      |            |
|---------------------|------------|----------------------|------------|
| O(13)-Ho(1)-O(14)   | 79.6(2)    | O(13)-Ho(1)-O(10)#3  | 76.04(18)  |
| O(14)-Ho(1)-O(10)#3 | 84.74(19)  | O(13)-Ho(1)-O(9)     | 143.14(18) |
| O(14)-Ho(1)-O(9)    | 76.54(18)  | O(10)#3-Ho(1)-O(9)   | 74.17(17)  |
| O(13)-Ho(1)-O(11)   | 82.89(19)  | O(14)-Ho(1)-O(11)    | 148.45(19) |
| O(10)#3-Ho(1)-O(11) | 116.16(17) | O(9)-Ho(1)-O(11)     | 130.04(18) |
| O(13)-Ho(1)-O(8)    | 150.20(18) | O(14)-Ho(1)-O(8)     | 128.25(18) |
| O(10)#3-Ho(1)-O(8)  | 94.39(17)  | O(9)-Ho(1)-O(8)      | 53.97(16)  |
| O(11)-Ho(1)-O(8)    | 76.13(17)  | O(13)-Ho(1)-O(2)#4   | 124.80(18) |
| O(14)-Ho(1)-O(2)#4  | 81.62(19)  | O(10)#3-Ho(1)-O(2)#4 | 151.95(17) |
| O(9)-Ho(1)-O(2)#4   | 78.86(16)  | O(11)-Ho(1)-O(2)#4   | 87.20(17)  |
| O(8)-Ho(1)-O(2)#4   | 75.48(17)  | O(13)-Ho(1)-O(1)#4   | 71.96(18)  |
| O(14)-Ho(1)-O(1)#4  | 77.3(2)    | O(10)#3-Ho(1)-O(1)#4 | 145.51(18) |
| O(9)-Ho(1)-O(1)#4   | 127.97(17) | O(11)-Ho(1)-O(1)#4   | 72.43(18)  |
| O(8)-Ho(1)-O(1)#4   | 119.87(17) | O(2)#4-Ho(1)-O(1)#4  | 53.35(17)  |
| O(13)-Ho(1)-O(10)   | 79.81(19)  | O(14)-Ho(1)-O(10)    | 146.45(18) |
| O(10)#3-Ho(1)-O(10) | 64.7(2)    | O(9)-Ho(1)-O(10)     | 105.99(17) |
| O(11)-Ho(1)-O(10)   | 52.43(16)  | O(8)-Ho(1)-O(10)     | 70.66(17)  |
| O(2)#4-Ho(1)-O(10)  | 131.92(18) | O(1)#4-Ho(1)-O(10)   | 120.37(17) |

### Complex 5

|                     |            |                     |            |
|---------------------|------------|---------------------|------------|
| Er(1)-O(12)         | 2.313(4)   | Er(1)-O(13)         | 2.318(4)   |
| Er(1)-O(9)#2        | 2.346(3)   | Er(1)-O(1)#3        | 2.391(3)   |
| Er(1)-O(10)         | 2.415(3)   | Er(1)-O(2)#3        | 2.418(3)   |
| Er(1)-O(5)          | 2.422(4)   | Er(1)-O(6)          | 2.472(4)   |
| Er(1)-O(9)          | 2.476(3)   | Cu(1)-O(7)          | 1.973(3)   |
| Cu(1)-N(2)#3        | 1.993(4)   | Cu(1)-O(4)#4        | 1.997(3)   |
| Cu(1)-N(1)          | 2.001(4)   | Cu(1)-O(11)         | 2.246(5)   |
| C(6)-O(1)-Er(1)#1   | 91.1(3)    | O(12)-Er(1)-O(13)   | 80.56(14)  |
| O(12)-Er(1)-O(9)#2  | 84.98(13)  | O(13)-Er(1)-O(9)#2  | 76.04(13)  |
| O(12)-Er(1)-O(1)#3  | 75.52(13)  | O(13)-Er(1)-O(1)#3  | 143.30(13) |
| O(9)#2-Er(1)-O(1)#3 | 74.52(12)  | O(12)-Er(1)-O(10)   | 147.94(13) |
| O(13)-Er(1)-O(10)   | 82.39(13)  | O(9)#2-Er(1)-O(10)  | 116.79(11) |
| O(1)#3-Er(1)-O(10)  | 130.83(12) | O(12)-Er(1)-O(2)#3  | 128.13(13) |
| O(13)-Er(1)-O(2)#3  | 149.40(13) | O(9)#2-Er(1)-O(2)#3 | 94.29(12)  |
| O(1)#3-Er(1)-O(2)#3 | 54.77(11)  | O(10)-Er(1)-O(2)#3  | 76.22(12)  |
| O(12)-Er(1)-O(5)    | 81.62(13)  | O(13)-Er(1)-O(5)    | 124.81(13) |
| O(9)#2-Er(1)-O(5)   | 152.40(11) | O(1)#3-Er(1)-O(5)   | 78.81(12)  |
| O(10)-Er(1)-O(5)    | 86.18(11)  | O(2)#3-Er(1)-O(5)   | 75.66(12)  |
| O(12)-Er(1)-O(6)    | 76.15(13)  | O(13)-Er(1)-O(6)    | 71.31(13)  |
| O(9)#2-Er(1)-O(6)   | 144.40(13) | O(1)#3-Er(1)-O(6)   | 127.34(12) |
| O(10)-Er(1)-O(6)    | 72.73(11)  | O(2)#3-Er(1)-O(6)   | 121.13(12) |
| O(5)-Er(1)-O(6)     | 53.77(12)  | O(12)-Er(1)-O(9)    | 146.72(13) |
| O(13)-Er(1)-O(9)    | 78.98(13)  | O(9)#2-Er(1)-O(9)   | 64.76(13)  |
| O(1)#3-Er(1)-O(9)   | 107.13(11) | O(10)-Er(1)-O(9)    | 52.99(11)  |

|                    |            |                     |            |
|--------------------|------------|---------------------|------------|
| O(2)#3-Er(1)-O(9)  | 70.72(12)  | O(5)-Er(1)-O(9)     | 131.66(12) |
| O(6)-Er(1)-O(9)    | 120.68(11) | O(7)-Cu(1)-N(2)#3   | 91.47(15)  |
| O(7)-Cu(1)-O(4)#4  | 172.57(15) | N(2)#3-Cu(1)-O(4)#4 | 88.86(15)  |
| O(7)-Cu(1)-N(1)    | 88.80(15)  | N(2)#3-Cu(1)-N(1)   | 177.05(18) |
| O(4)#4-Cu(1)-N(1)  | 90.50(15)  | O(7)-Cu(1)-O(11)    | 91.15(17)  |
| N(2)#3-Cu(1)-O(11) | 92.33(17)  | O(4)#4-Cu(1)-O(11)  | 96.25(17)  |
| N(1)-Cu(1)-O(11)   | 90.61(17)  |                     |            |

Symmetry transformations used to generate equivalent atoms for **1**: #1  $-x+3/2, y-1/2, -z+1/2$ ; #2  $-x+2, -y, -z+1$ ; #3  $x+1, y, z$ ; #4  $-x+5/2, y-1/2, -z+1/2$ ; #5  $x-1/2, -y+1/2, z-1/2$ ; #6  $x+1/2, -y+1/2, z-1/2$ ; #7  $-x+3/2, y+1/2, -z+1/2$ . For **2**: #1  $-x+3/2, y-1/2, -z+1/2$ ; #2  $-x+2, -y, -z+1$ ; #3  $x+1, y, z$ ; #4  $-x+5/2, y-1/2, -z+1/2$ ; #5  $x-1/2, -y+1/2, z-1/2$ ; #6  $x+1/2, -y+1/2, z-1/2$ ; #7  $-x+3/2, y+1/2, -z+1/2$ . For **3**: #1  $x+1/2, -y+1/2, z+1/2$ ; #2  $x+1, y, z$ ; #3  $-x+1/2, y+1/2, -z+3/2$ ; #4  $x-1, y, z$ ; #5  $-x-1/2, y-1/2, -z+3/2$ . For **4**: #1  $-x+1, y+1/2, -z+1/2$ ; #2  $-x, y-1/2, -z+1/2$ ; #3  $-x, -y+1, -z$ ; #4  $x, y+1, z$ . For **5**: #1  $-x, -y, -z+1$ ; #2  $-x+1, y-1/2, -z+3/2$ ; #3  $-x+2, y-1/2, -z+3/2$ .

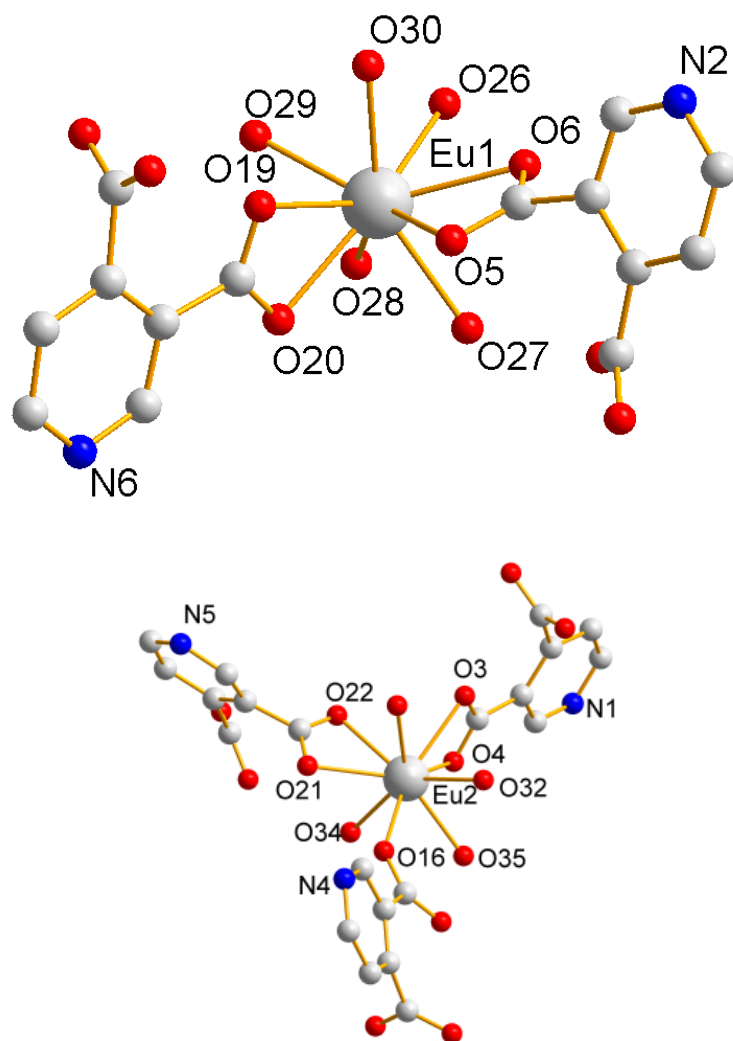

**Fig. S1** The coordination environments of Eu(III) ions in **1**, all hydrogen atoms are omitted for clarity

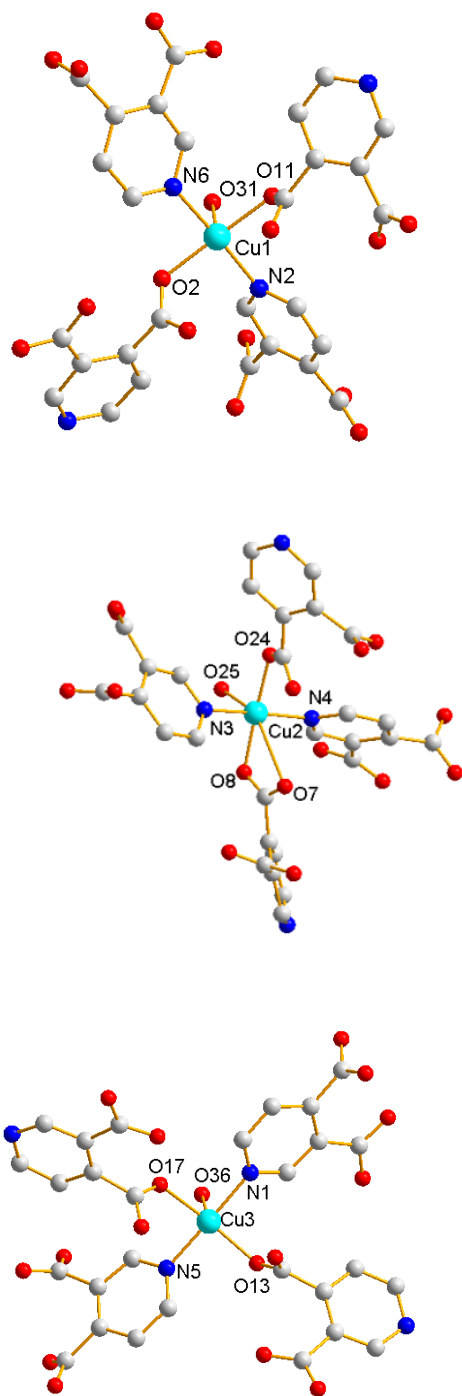

**Fig. S2** The coordination environments of Cu(II) ions in **1**, all hydrogen atoms are omitted for clarity.



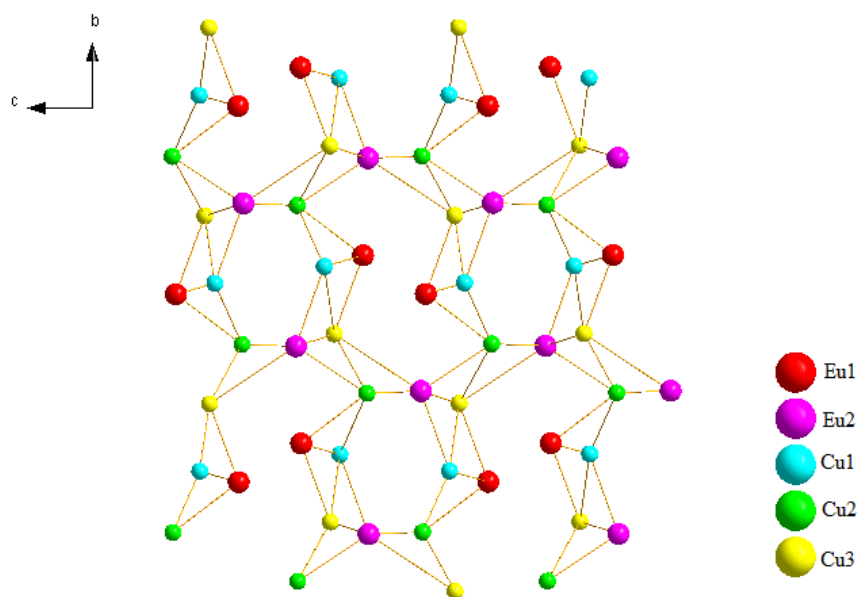

**Fig. S3** View of the 5-nodal points with 4,6,7,7,8-connected topologic network of **1**.

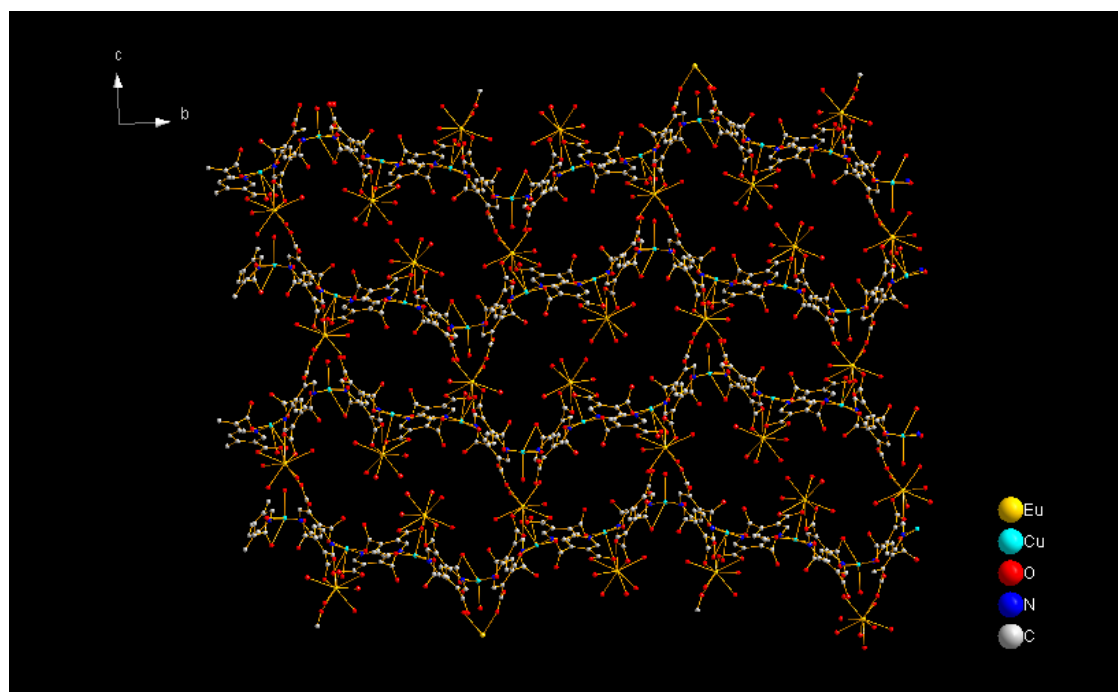

**Fig. S4** Projection of the 3D framework showing the 1D channels in **1**; the H atoms and lattice water molecules are omitted for clarity.

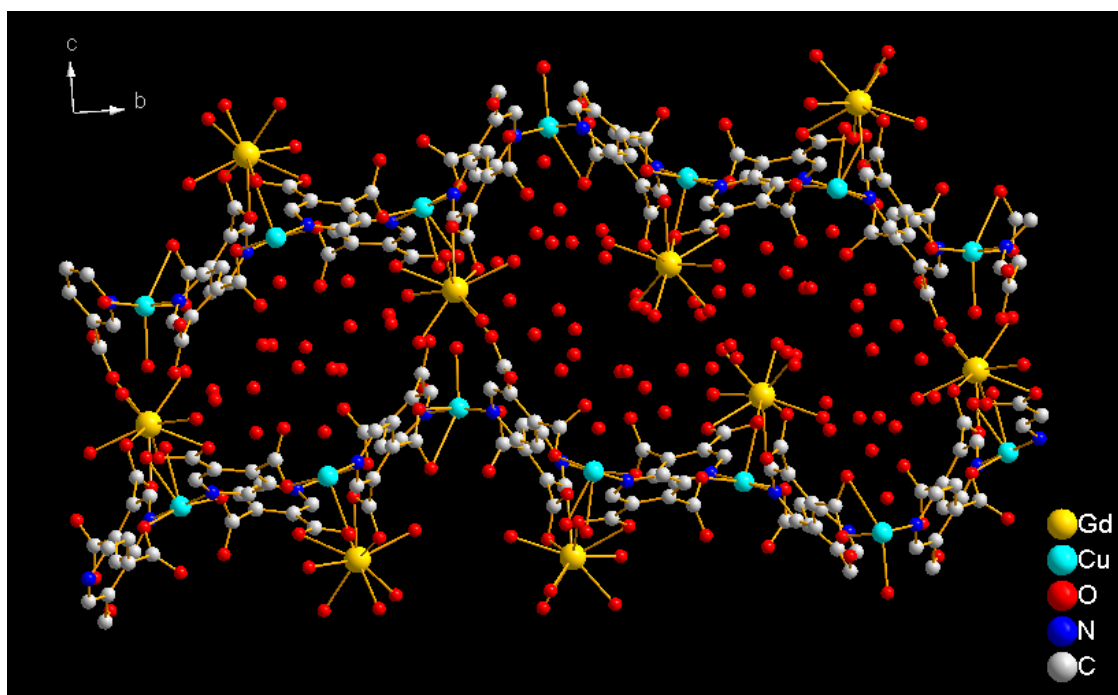

**Fig. S5** View of S-shape channel and smaller hexagonal channel which are all filled with guest water molecules in **2**; the H atoms are omitted for clarity.

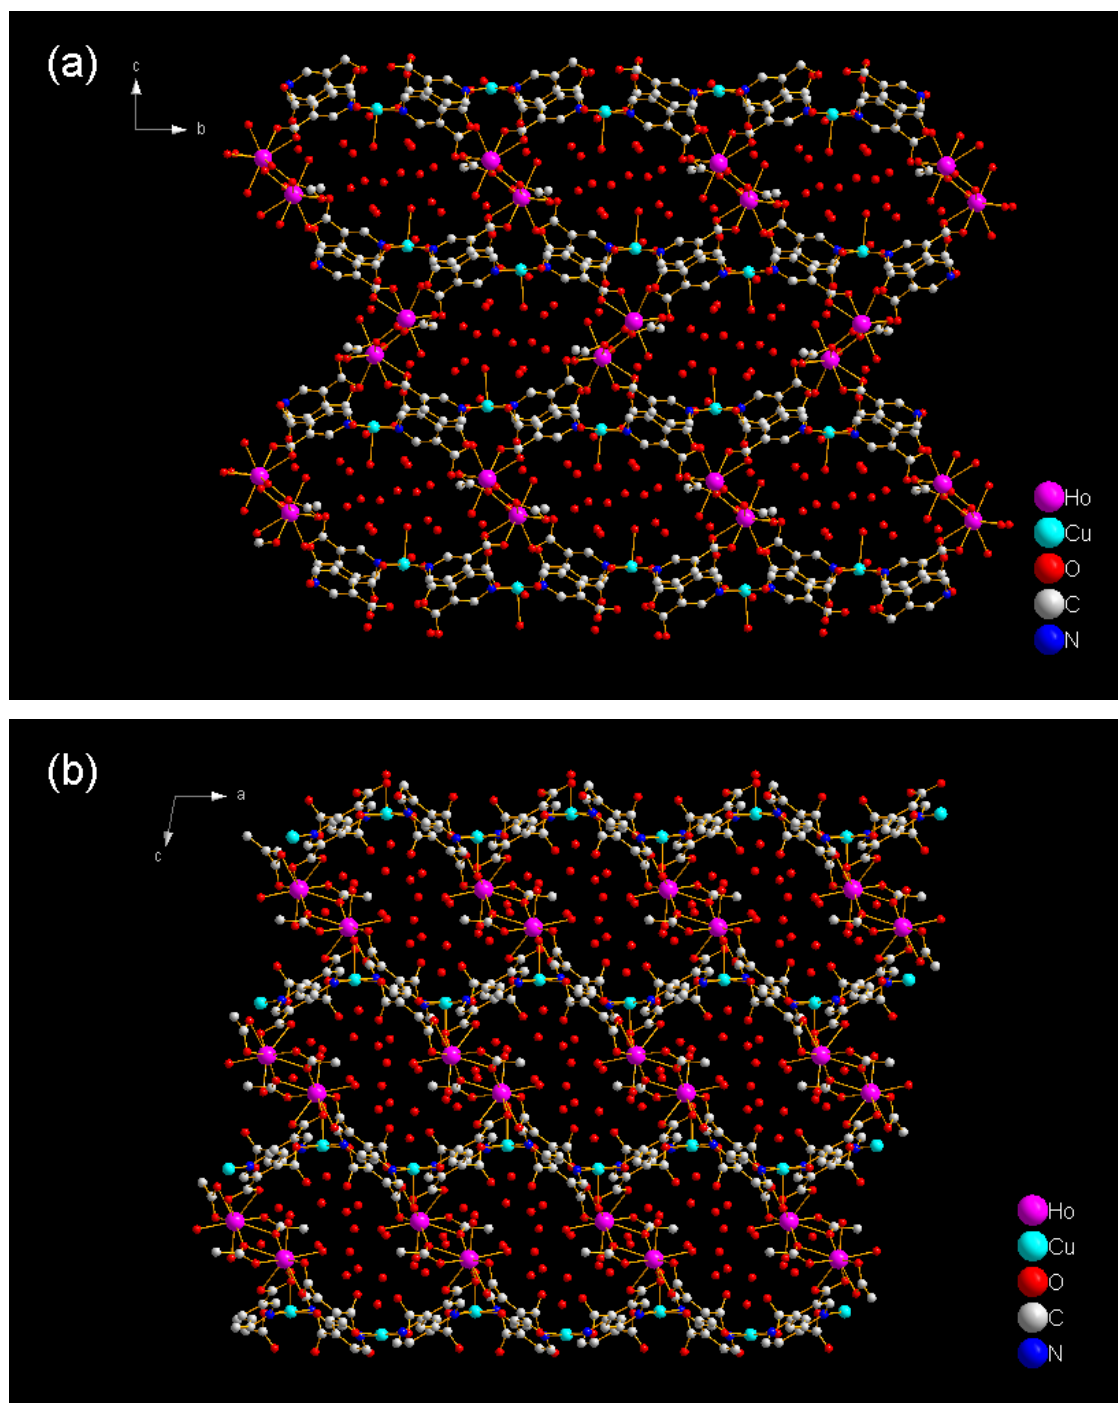

**Fig. S6** Projection of the 3D framework viewed along the  $a$  axis (a) and  $b$  axis (b) showing 1D channels in **4**; the H atoms are omitted for clarity.

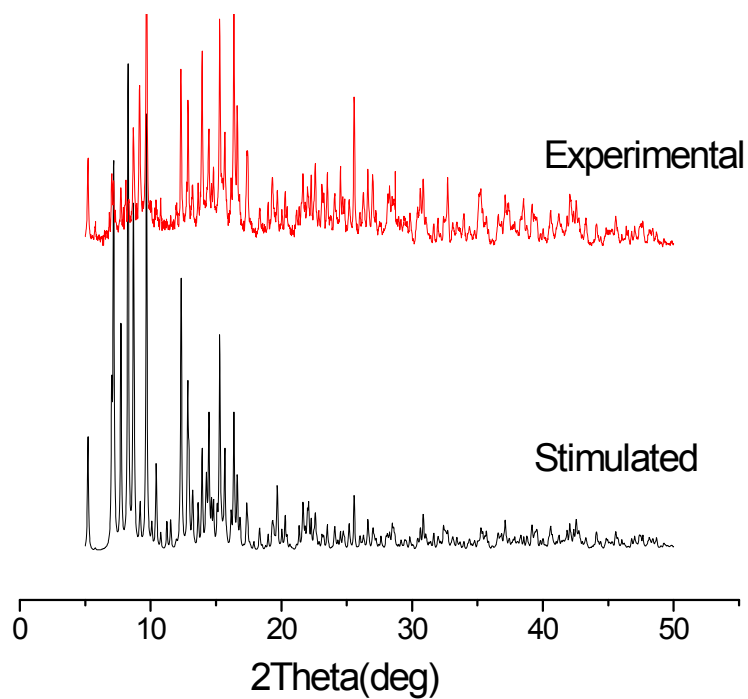

**Fig. S7** Simulated and experimental X-ray powder diffraction patterns of complex 1.

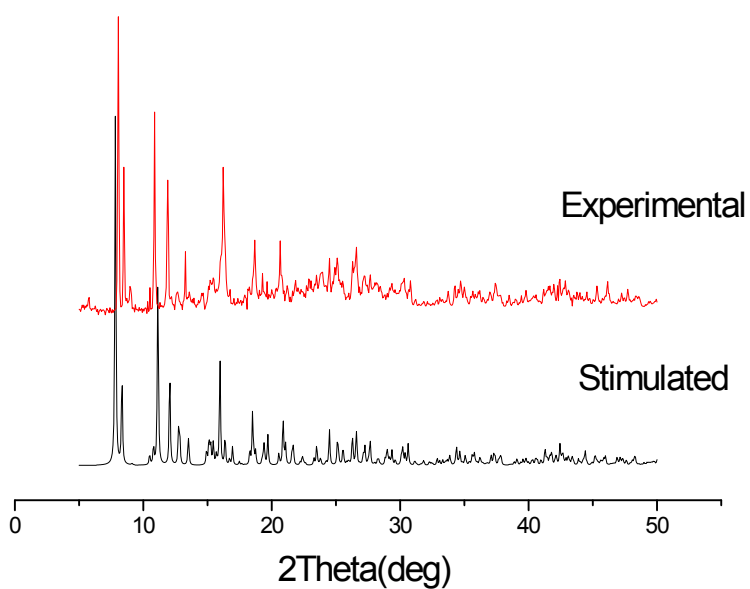

**Fig. S8** Simulated and experimental X-ray powder diffraction patterns of complex 4.

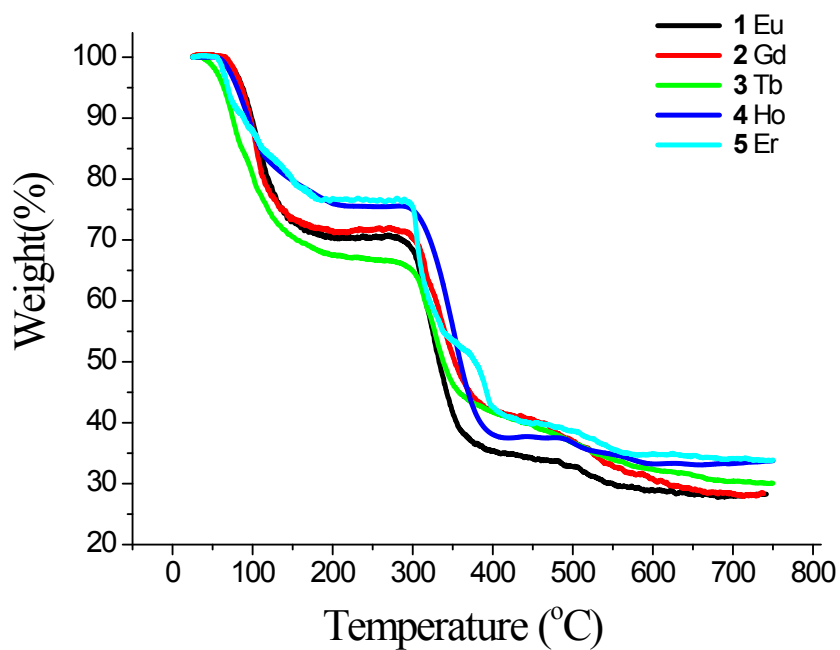

**Fig. S9** Thermal gravimetric analysis (TGA) curves of complexes **1–5**.

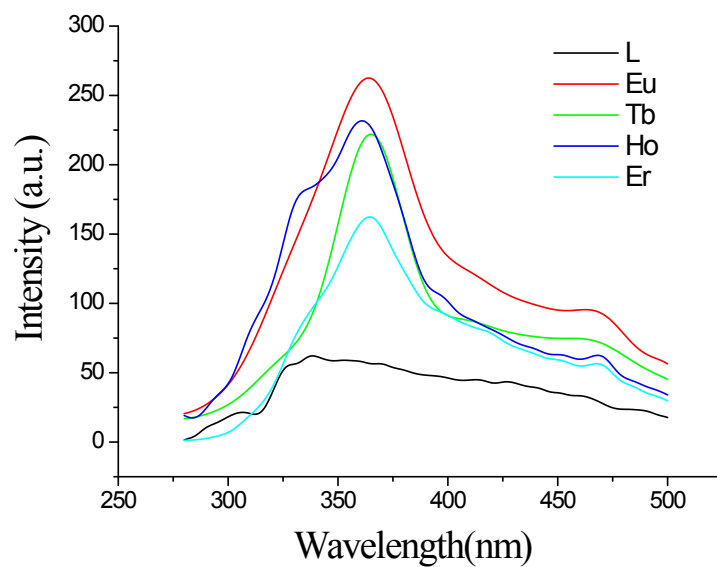

**Fig. S10** Photoemission spectra of free 3,4-pdcH<sub>2</sub> ligand and complexes **1, 3, 4, 5** in the solid state at room temperature

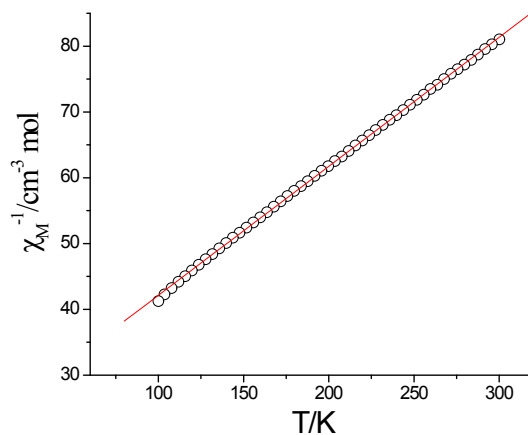

**Fig. S11** The  $\chi_M^{-1}$  versus  $T$  curve for **1**. The solid line represents the Curie-Weiss fitting result.

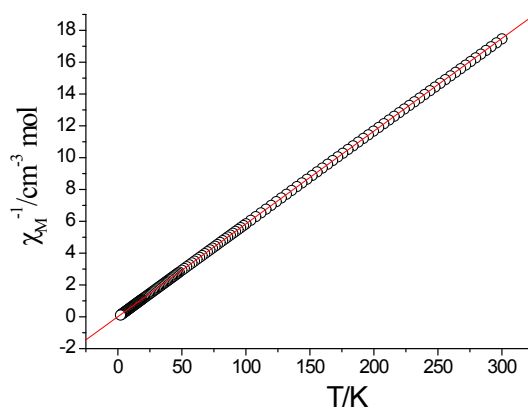

**Fig. S12** The  $\chi_M^{-1}$  versus  $T$  curve for **2**. The solid line represents the Curie-Weiss fitting result.
